# Supplementary material for: A comparison of machine learning classifiers for pediatric epilepsy using resting-state functional MRI latency data
Source: PubMed Central journal article supplement — Biomed Rep. 2021 Jul 23;15(3):77. doi: 10.3892/br.2021.1453 (PMC8330002; doi:10.3892/br.2021.1453), 2021-07-23
Supplement: Supplementary_Data.pdf [file Supplementary_Data.pdf]

Table S1. Scanner parameters for resting-state functional MRI data acquisition for both the healthy control and refractory epilepsy cohorts.

| A, Healthy Control Cohort                  |                     |                     |               |            |                   |                  |                 |  |  |
|--------------------------------------------|---------------------|---------------------|---------------|------------|-------------------|------------------|-----------------|--|--|
| Institution                                | Scanner             | Repetition time, ms | Echo time, ms | Flip angle | Field of view, mm | Number of slices | Slice thickness |  |  |
| Brown University                           | Siemens Trio 3T     | 2,000               | 25            | 90         | 192               | 35               | 3               |  |  |
| Kennedy Krieger Institute                  | Philips 3T          | 2,500               | 30            | 75         | 256               | 47               | 3               |  |  |
| NeuroIMAGE                                 | Siemens Avanto 1.5T | 1,940               | 40            | 80         | 224               | 37               | 3               |  |  |
| New York University Langone Medical Center | Siemens Allegra 3T  | 2,000               | 15            | 90         | 240               | 33               | 4               |  |  |
| OHSU                                       | Siemens Trio 3T     | 2,500               | 30            | 90         | 240               | 36               | 3.8             |  |  |
| Peking                                     | Siemens Trio 3T     | 2,000               | 30            | 90         | 200               | 33               | 3.5             |  |  |
|                                            | Siemens Trio 3T     | 2,000               | 30            | 90         | 200               | 33               | 3               |  |  |
|                                            | Siemens Trio 3T     | 2,000               | 30            | 90         | 220               | 30               | 4.5             |  |  |
| Pittsburg                                  | Siemens Trio 3T     | 1,500               | 29            | 70         | 200               | 29               | 4               |  |  |
| Washington University                      | Siemens Trio 3T     | 2,500               | 27            | 90         | 256               | 32               | 4               |  |  |
| B, Refractory Epilepsy Cohort              |                     |                     |               |            |                   |                  |                 |  |  |
| Institution                                | Scanner             | Repetition time, ms | Echo time, ms | Flip angle | Field of view, mm | Number of slices | Slice thickness |  |  |
| Washington University                      | Siemens Trio 3T     | 2,070               | 25            | 90         | 256               | 36               | 4               |  |  |
| Children's Memorial Hermann Hospital       | Siemens Trio 3T     | 3,000               | 30            | 90         | 144               | 45               | 3               |  |  |
